# Supplementary material for: Evapotranspiration partition using the multiple energy balance version of the ISBA-A-g s land surface model over two irrigated crops in a semi-arid Mediterranean region (Marrakech, Morocco)
Source: Copernicus journal article supplement (doi:10.5194/hess-2019-532), 2019-10-15
Supplement: Supplementary file 1 [file hess-2019-532-supplement.pdf]

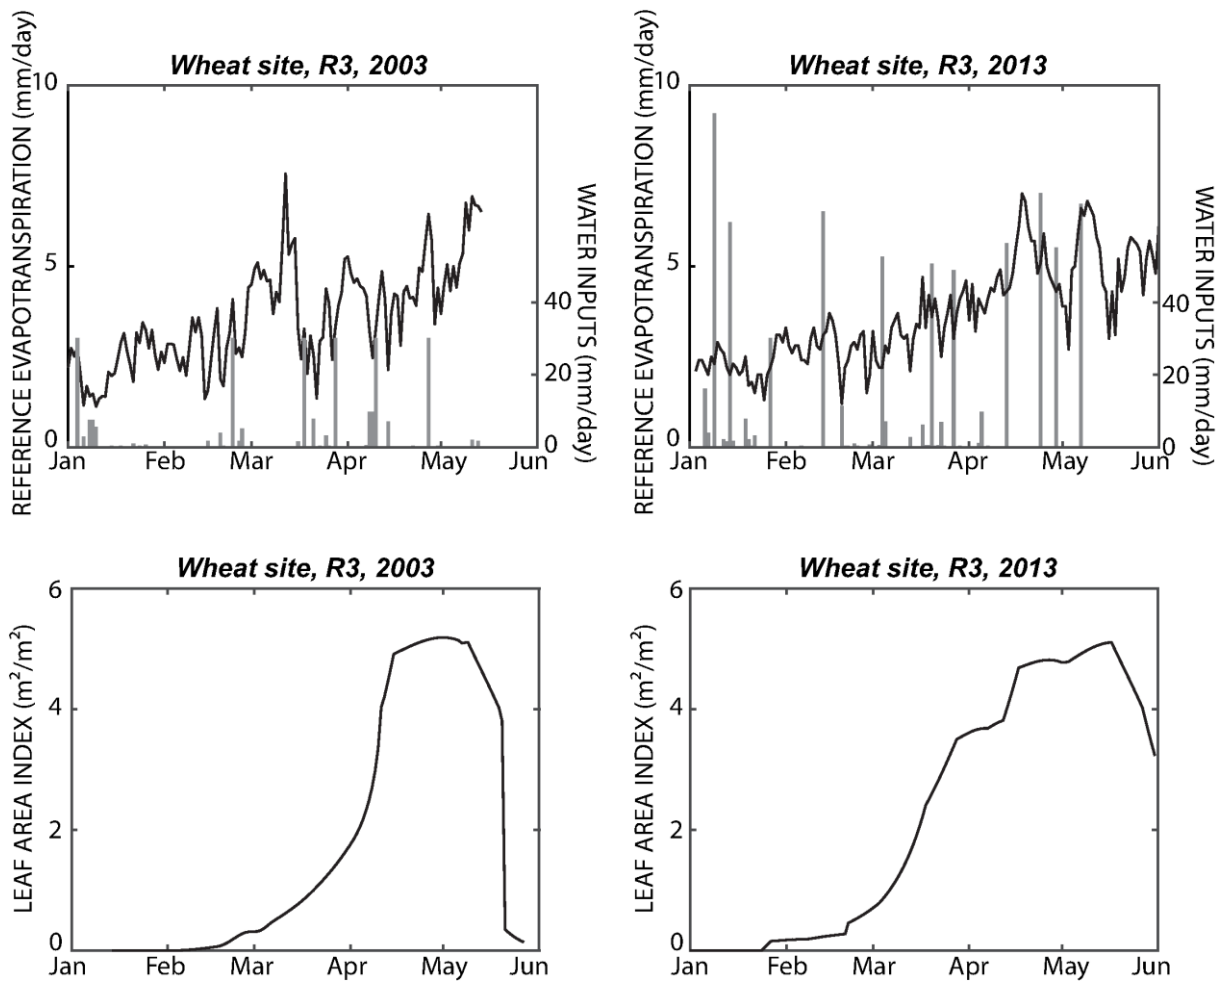

**Figure S1** : Evolution of the daily  $ET_0$  and of LAI at the R3 site for the 2003 and 2013 seasons.

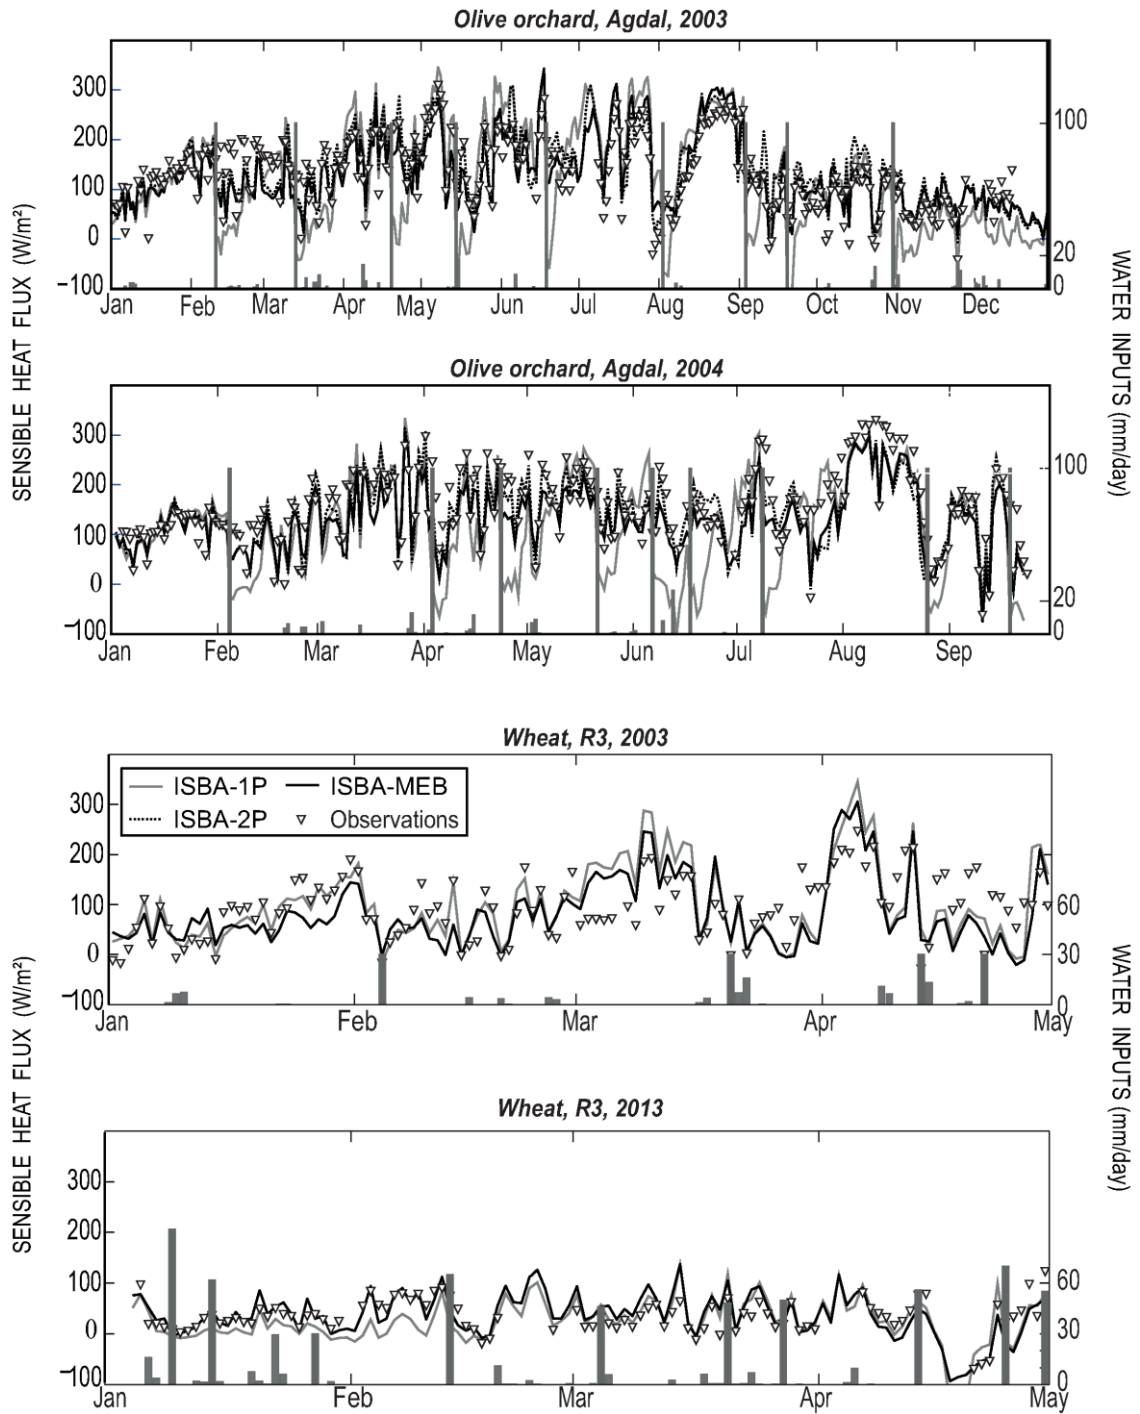

**Figure S2** : Time series of the simulated and measured sensible heat flux (H) for the Agdal site (2003 and 2004 seasons) and for the R3 site (2003 and 2013 seasons).

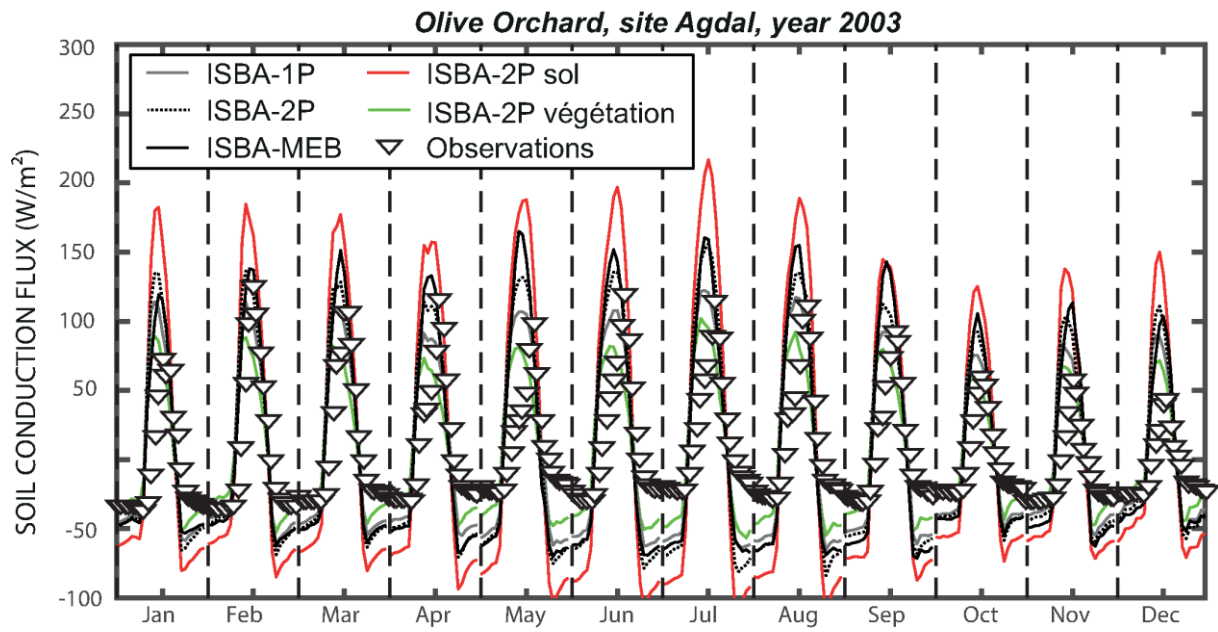

**Figure S3** : Monthly diurnal cycles of the ground heat flux (G) simulated by the three configurations with a distinction between the patch bare soil and the patch vegetation for the 2P configuration.

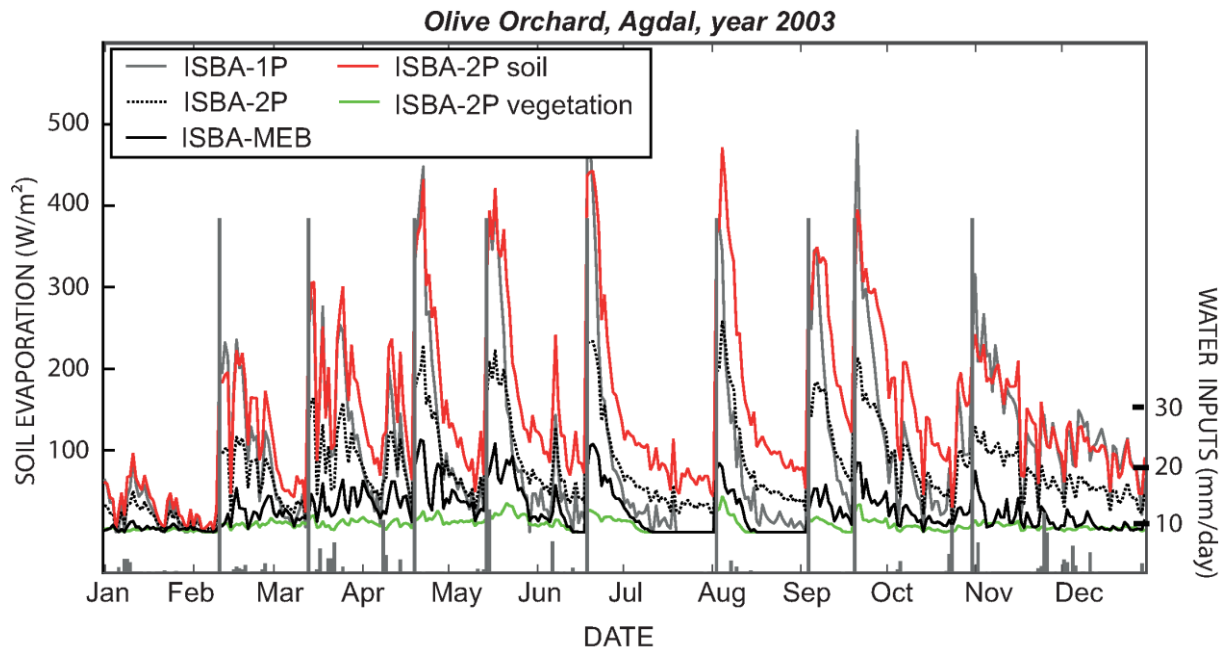

**Figure S4** : Time series of the soil evaporation simulated by the three configurations for the Agdal site (2003 season). The two patches of ISBA-2P "bare soil" and "vegetation" were added for comparison.
